# Supplementary material for: First identification of two co-existing genome-wide significant sex quantitative trait loci (QTL) in red tilapia using integrative QTL mapping
Source: PubMed Central journal article supplement — Zool Res. 2022 Mar 18;43(2):205–16. doi: 10.24272/j.issn.2095-8137.2021.402 (PMC8920840; doi:10.24272/j.issn.2095-8137.2021.402), 2022-03-18
Supplement: zr-43-2-205-S1.pdf [file zr-43-2-205-S1.pdf]

## Supplementary Materials

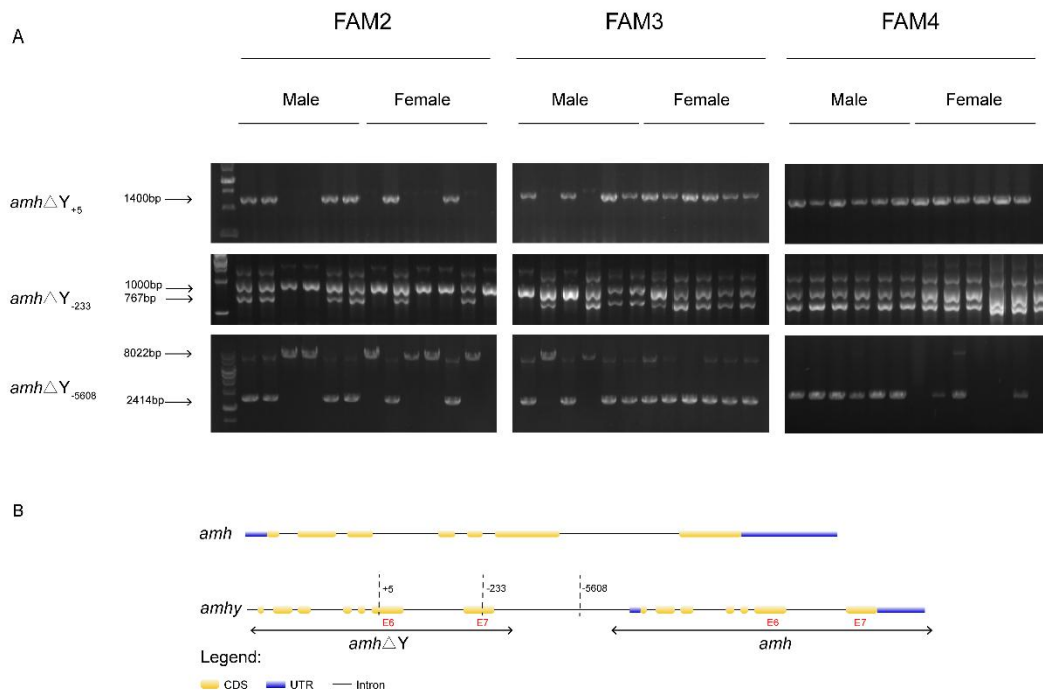

### Supplementary Figure S1. PCR amplification of *amhy* in male red tilapia.

A: Y-specific duplicate of *amh* gene was amplified in male red tilapia by *amh* Y chromosome markers. All individual genotypes are presented. B: Structures of *amh* and *amhy* genes in previous studies.

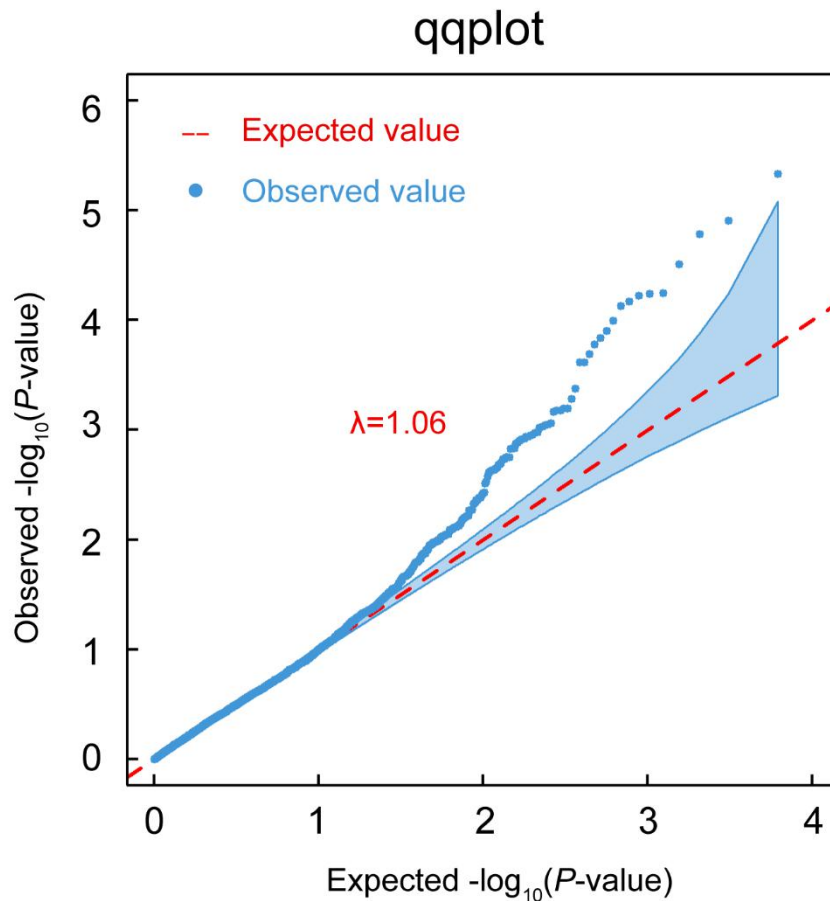

**Supplementary Figure S2. QQ plot of  $P$ -values for FAM3 from GWAS analysis using MLM with 11 PCA components.**

Observed negative base 10 logarithm of  $P$ -values was plotted against expected observed negative base 10 logarithm of  $P$ -values under assumption that  $P$ -values follow a uniform  $[0,1]$  distribution. Red dotted line represents expected value and blue dots represent observed value. Inflation factor lambda ( $\lambda$ ) is 1.06.

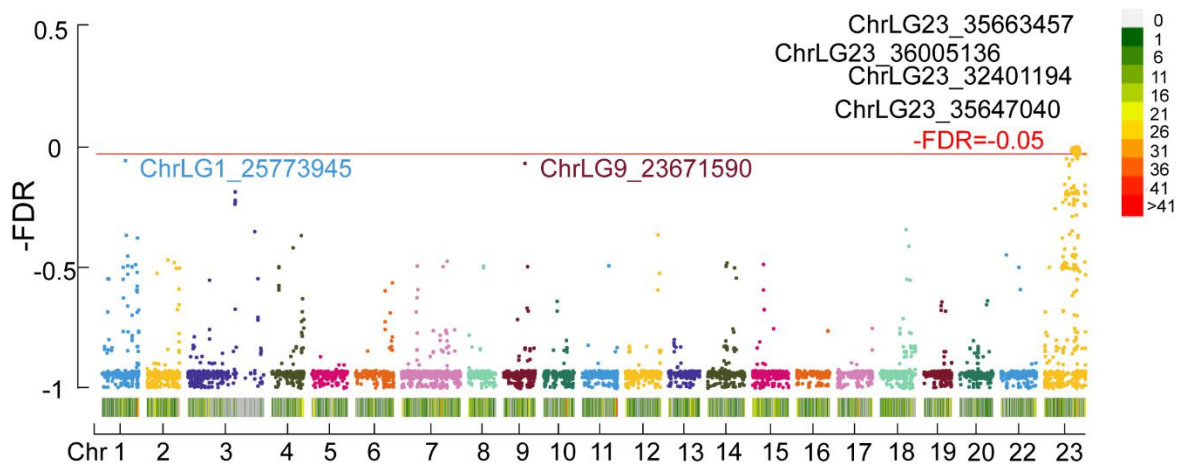

**Supplementary Figure S3. Genome-wide significant QTL intervals identified by GWAS for sex in FAM3.**

X-axis indicates chromosome numbers labeled with different colors. Y-axis is -FDR value for each SNP marker by GWAS, corrected by FDR. Corrected genome-wide significant threshold ( $-q(\text{FDR})=0.05$ ) is indicated. There are four SNPs on chrLG23 above the corrected threshold level. Legend on upper right indicates density of SNPs across genome, with green indicating low density and red indicating high density.

**Supplementary Table S1. Primer list used in qRT-PCR and marker development**

| Primer name                   | Species     | Chromosome | Forward primer (5'-3')  | Reverse primer (3'-5')     | PCR product size | T <sub>m</sub> |
|-------------------------------|-------------|------------|-------------------------|----------------------------|------------------|----------------|
| <i>sox14</i>                  | Red tilapia | ChrLG23    | CCTGCTCAAGAAGGACCGTT    | AGCTGAACTGACTTGGGTCG       | 176bp            | 55°C           |
| <i>dot11</i>                  | Red tilapia | ChrLG23    | CAGCTACCTATGCAGAGACCA   | CTCTGGACCAAAGGCAAAGT       | 173bp            | 52.3°C         |
| <i>scly</i>                   | Red tilapia | ChrLG23    | CTTCACATCAGCTTACAAGGGTA | GGGCTTCAGAAATGGCCTGA       | 185bp            | 55.8°C         |
| <i>atp10a</i>                 | Red tilapia | ChrLG23    | GACTGCGAGTTTGACCCCTT    | GTAGCAGTCAGCGTCTTTGC       | 179bp            | 55.8°C         |
| <i>slco2a1</i>                | Red tilapia | ChrLG23    | CCCCTACAGGATTGGGGAGT    | ATGTACATGGGGTTGTGCGT       | 162bp            | 57.9°C         |
| <i>oca2</i>                   | Red tilapia | ChrLG23    | AACCTGCCAGTTAAACCGCT    | GGGGAATCCCAGCTTGAAGA       | 162bp            | 55.8°C         |
| <i>amh</i>                    | Red tilapia | ChrLG23    | GACACACAGTGCTGCTATTTT   | TGGGAGTGAGTACTCGGTTA       | 220bp            | 53.8°C         |
| <i>lpp</i>                    | Red tilapia | ChrLG23    | GAAGCTAGCAGTTTGTGTGCC   | AGACGGAGATGCTCGCACTA       | 179bp            | 56.1°C         |
| <i>gpr17</i>                  | Red tilapia | ChrLG23    | TGTTCCGCCTACTGCTTGTT    | ATGCGCACGCACATTTGATT       | 194bp            | 53.8°C         |
| <i>ube3a</i>                  | Red tilapia | ChrLG23    | CAGCGTCCATCGGCCTTATT    | GCAGTCGCTCTGTTCATTCG       | 204bp            | 55°C           |
| <i>tp63</i>                   | Red tilapia | ChrLG23    | GCTGAGGATGCCCCATTAG     | AGGGTCCCTGAGTATGTCTGA      | 150bp            | 55.3°C         |
| <i>cog4</i>                   | Red tilapia | ChrLG1     | ATCTTCCCTCTTCTGGGCCT    | GCGTTAGCGTGTCTGCAAAT       | 160bp            | 60°C           |
| SSR141                        | Red tilapia | ChrLG1     | TTTTCACACCACTGAGTCGCAA  | AAGTGTGTTTTCTGTCAAGTCTG    | 270bp            | 60.14°C        |
| SSR147                        | Red tilapia | ChrLG1     | TACTCTCCCAACACCCACA     | TGCTGCTTACACACCTTGTGT      | 203bp            | 58.60°C        |
| SSR3204                       | Red tilapia | ChrLG23    | GACAGTGCAGACGCAACAGT    | CAGGGTCTTGCTGCCTTTAG       | 189bp            | 60.10°C        |
| SSR3293                       | Red tilapia | ChrLG23    | CGGTTGCCGTGTAAGATT      | TGAGCATGGACTGACAGGAG       | 217bp            | 59.98°C        |
| <i>amh</i> Δ <sub>Y+5</sub>   | Red tilapia | ChrLG23    | AAACCTCCTTCTTTGTGAATGTC | CTAGCGGCATCCACACTCCCTCAC   | 1400bp           | 58.2°C         |
| <i>amh</i> Δ <sub>Y-233</sub> | Red tilapia | ChrLG23    | CGGTCCCAGTGACCTATGAG    | AAGTACACGTGGTGTATTGTAATTGA | 767bp            | 57.9°C         |
| <i>amh</i> Y <sub>-5608</sub> | Red tilapia | ChrLG23    | GAAAGGGGTGTTTTGGTGTGCGC | ACCCAGGAAGCGTTTCATCTCA     | 2414bp           | 60.2°C         |

**Supplementary Table S2. Summary of QTL-seq analysis data for FAM1**

| <b>Chromosome</b> | <b>Window number</b> | <b>Average SNP number/window</b> | <b>SNP range/window</b> | <b>Average <i>Fst</i>/window</b> | <b><i>Fst</i> range/window</b> |
|-------------------|----------------------|----------------------------------|-------------------------|----------------------------------|--------------------------------|
| ChrLG1            | 3168                 | 37.6                             | 21-378                  | 0.087                            | 0.010-0.269                    |
| ChrLG2            | 3769                 | 42.3                             | 21-303                  | 0.041                            | 0.012-0.141                    |
| ChrLG3            | 1887                 | 51.5                             | 21-289                  | 0.049                            | 0.007-0.178                    |
| ChrLG4            | 2994                 | 41.5                             | 21-381                  | 0.053                            | 0.006-0.185                    |
| ChrLG5            | 1976                 | 40.3                             | 21-262                  | 0.054                            | 0.008-0.174                    |
| ChrLG6            | 4600                 | 40.6                             | 21-306                  | 0.050                            | 0.010-0.163                    |
| ChrLG7            | 6052                 | 41.4                             | 21-321                  | 0.052                            | 0.005-0.158                    |
| ChrLG8            | 4838                 | 46.0                             | 21-260                  | 0.048                            | 0.009-0.123                    |
| ChrLG9            | 1644                 | 42.5                             | 21-230                  | 0.052                            | 0.009-0.133                    |
| ChrLG10           | 1224                 | 40.8                             | 21-243                  | 0.048                            | 0.010-0.152                    |
| ChrLG11           | 1370                 | 38.0                             | 21-183                  | 0.049                            | 0.008-0.134                    |
| ChrLG12           | 3164                 | 38.1                             | 21-207                  | 0.048                            | 0.009-0.128                    |
| ChrLG13           | 3160                 | 40.2                             | 21-277                  | 0.056                            | 0.007-0.171                    |
| ChrLG14           | 4380                 | 41.7                             | 21-301                  | 0.057                            | 0.011-0.154                    |
| ChrLG15           | 3467                 | 47.6                             | 21-439                  | 0.051                            | 0.011-0.143                    |
| ChrLG16           | 4435                 | 41.6                             | 21-488                  | 0.051                            | 0.010-0.156                    |
| ChrLG17           | 4552                 | 42.3                             | 21-479                  | 0.056                            | 0.006-0.164                    |
| ChrLG18           | 3925                 | 42.4                             | 21-431                  | 0.053                            | 0.010-0.150                    |
| ChrLG19           | 3303                 | 41.3                             | 21-271                  | 0.049                            | 0.012-0.147                    |
| ChrLG20           | 2846                 | 41.1                             | 21-228                  | 0.048                            | 0.010-0.157                    |
| ChrLG22           | 2687                 | 42.0                             | 21-278                  | 0.052                            | 0.008-0.161                    |
| ChrLG23           | 1505                 | 39.3                             | 21-265                  | 0.062                            | 0.009-0.175                    |
| Average           | 3225                 | 41.9                             | –                       | 0.053                            | –                              |

**Supplementary Table S3. Distribution of SNP markers among chromosomes in FAM2**

| <b>Chromosome</b> | <b>Physical distance (bp)</b> | <b>Number of SNP markers</b> | <b>LOD value range</b> | <b>% Expl. range</b> |
|-------------------|-------------------------------|------------------------------|------------------------|----------------------|
| ChrLG1            | 40673430                      | 42                           | 0.79-5.01              | 3.5-20.1             |
| ChrLG2            | 36523203                      | 55                           | 0-0.47                 | 0-2.1                |
| ChrLG3            | 87567345                      | 87                           | 0-1.18                 | 0-5.2                |
| ChrLG4            | 35549522                      | 138                          | 0-0.83                 | 0-3.6                |
| ChrLG5            | 39714817                      | 122                          | 0-1.57                 | 0-6.8                |
| ChrLG6            | 42433576                      | 41                           | 0-0.36                 | 0-1.6                |
| ChrLG7            | 64772279                      | 85                           | 0-1.09                 | 0-4.7                |
| ChrLG8            | 30527416                      | 42                           | 0-0.64                 | 0-2.8                |
| ChrLG9            | 35850837                      | 39                           | 0-0.94                 | 0-4.1                |
| ChrLG10           | 34704454                      | 97                           | 0-0.52                 | 0-2.3                |
| ChrLG11           | 39275952                      | 132                          | 0-1.89                 | 0-8.1                |
| ChrLG12           | 38600464                      | 146                          | 0.01-0.51              | 0-2.2                |
| ChrLG13           | 34734273                      | 69                           | 0-1.62                 | 0-7                  |
| ChrLG14           | 40509636                      | 50                           | 0-0.46                 | 0-2.1                |
| ChrLG15           | 39688505                      | 86                           | 0-0.72                 | 0-3.2                |
| ChrLG16           | 36041493                      | 64                           | 0-1.04                 | 0-4.6                |
| ChrLG17           | 38839487                      | 39                           | 0.01-0.76              | 0-3.3                |
| ChrLG18           | 38636442                      | 60                           | 0.01-0.65              | 0.1-2.9              |
| ChrLG19           | 30963196                      | 135                          | 0-0.6                  | 0-2.6                |
| ChrLG20           | 37140374                      | 41                           | 0-1.17                 | 0-5.1                |
| ChrLG22           | 39199643                      | 82                           | 0-0.79                 | 0-3.5                |
| ChrLG23           | 45655644                      | 72                           | 0-0.68                 | 0-3                  |
| Total             | —                             | 1724                         | 0-5.01                 | 0-20.1               |

**Supplementary Table S4. Information on all SNP markers at genome-wide significance on ChrLG1 or ChrLG23 of FAM2 and FAM4**

| Chromosome | Population name | Genetic distance (cM) | Position (bp) | LOD value | % Expl. | SNP annotation                      |
|------------|-----------------|-----------------------|---------------|-----------|---------|-------------------------------------|
| ChrLG1     |                 | 31.654                | 21096680      | 5.01      | 20.1    | <i>LOC112847427</i> Upstream:3011   |
| ChrLG1     |                 | 31.654                | 21096664      | 5.01      | 20.1    | <i>rpl13</i> Exon:2:6               |
| ChrLG1     |                 | 31.654                | 21096727      | 5.01      | 20.1    | <i>LOC100712533</i> Downstream:3692 |
| ChrLG1     |                 | 31.678                | 20761648      | 5.01      | 20.1    |                                     |
| ChrLG1     |                 | 31.678                | 20761731      | 5.01      | 20.1    |                                     |
| ChrLG1     |                 | 31.678                | 20761592      | 5.01      | 20.1    |                                     |
| ChrLG1     |                 | 8.106                 | 18807025      | 4.56      | 18.4    | <i>EIF3J</i> Downstream:1239        |
| ChrLG1     |                 | 29.246                | 22632441      | 4.56      | 18.4    | <i>COG4</i> Intron:7:18             |
| ChrLG1     | FAM2            | 29.246                | 22632627      | 4.56      | 18.4    | <i>COG4</i> Intron:6:18             |
| ChrLG1     |                 | 29.246                | 22632634      | 4.56      | 18.4    | <i>COG4</i> Intron:6:18             |
| ChrLG1     |                 | 32.457                | 19010360      | 4.56      | 18.4    | <i>LOC100698737</i> Intron:1:29     |
| ChrLG1     |                 | 32.457                | 19010394      | 4.56      | 18.4    | <i>LOC100698737</i> Intron:1:29     |
| ChrLG1     |                 | 10.936                | 23971887      | 4.13      | 16.9    | <i>LOC100702345</i> Upstream:315    |
| ChrLG1     |                 | 10.936                | 23971966      | 4.13      | 16.9    | <i>LOC100702345</i> Upstream:394    |
| ChrLG1     |                 | 33.236                | 15071526      | 4.13      | 16.9    | <i>LOC100693785</i> Intron:2:3      |
| ChrLG1     |                 | 33.242                | 16696311      | 4.13      | 16.9    | <i>LOC100710764</i> Intron:5:8      |
| ChrLG1     |                 | 33.242                | 15630254      | 4.13      | 16.9    | <i>LOC100693248</i> Intron:5:29     |
| ChrLG1     |                 | 26.79                 | 25773889      | 3.73      | 15.4    | <i>LOC100699231</i> Upstream:3251   |
| ChrLG23    |                 | 47.362                | 32948918      | 27.71     | 37.5    | <i>LPP</i> Intron:6:10              |
| ChrLG23    |                 | 47.189                | 32970125      | 26.82     | 36.6    | <i>LPP</i> Intron:6:10              |
| ChrLG23    | FAM4            | 49.508                | 33386273      | 26.25     | 36      | <i>ATP10A</i> Upstream:2733         |
| ChrLG23    |                 | 45.974                | 32512288      | 23.95     | 35      | <i>SNED1</i> Exon:2:31              |
| ChrLG23    |                 | 59.246                | 35555909      | 22.11     | 30.9    | <i>NFIA</i> Upstream:1924           |

|         |      |        |          |       |      |                     |                 |
|---------|------|--------|----------|-------|------|---------------------|-----------------|
| ChrLG23 |      | 58.935 | 35555920 | 21.53 | 30.3 | <i>nfia</i>         | Upstream:1913   |
| ChrLG23 |      | 60.44  | 35934888 | 18.86 | 27   | <i>tubgcp5</i>      | Intron:12:22    |
| ChrLG23 |      | 28.801 | 32904594 | 16.46 | 31.9 | <i>LOC100694679</i> | Intron:4:11     |
| ChrLG23 |      | 68.444 | 43270127 | 16.38 | 28.7 | <i>LOC100706092</i> | Downstream:25   |
| ChrLG23 |      | 69.018 | 43738701 | 16    | 27.1 | <i>ttc39a</i>       | Intron:1:20     |
| ChrLG23 |      | 69.018 | 43738643 | 15.7  | 26.6 | <i>ttc39a</i>       | Intron:1:20     |
| ChrLG23 |      | 71.821 | 41301803 | 14.88 | 21.9 | <i>LOC100710029</i> | Intron:1:7      |
| ChrLG23 |      | 73.795 | 44949883 | 14.51 | 21.5 | <i>LOC112843737</i> | Downstream:3671 |
| ChrLG23 |      | 71.513 | 45206551 | 14.41 | 21.8 | <i>p3h2</i>         | Intron:1:14     |
| ChrLG23 |      | 70.028 | 44487138 | 14.27 | 23.1 |                     |                 |
| ChrLG23 |      | 70.13  | 45161161 | 14.15 | 22.7 | <i>cpox</i>         | Upstream:84     |
| ChrLG23 |      | 73.518 | 45235481 | 13.91 | 20.6 | <i>ccdc50</i>       | Downstream:2015 |
| ChrLG23 |      | 71.019 | 44798015 | 12.83 | 19.2 | <i>LOC100702158</i> | Downstream:3498 |
| ChrLG23 |      | 70.686 | 44859705 | 12.78 | 19.5 | <i>LOC100701890</i> | Intron:2:63     |
| ChrLG23 |      | 22.974 | 24533428 | 11.52 | 17.7 |                     |                 |
| ChrLG23 |      | 21.098 | 26908972 | 10.39 | 16.1 | <i>fbxo3</i>        | Downstream:3154 |
| ChrLG23 |      | 20.646 | 22039918 | 9.67  | 15   | <i>unc80</i>        | Upstream:3901   |
| ChrLG23 |      | 18.786 | 20736202 | 7.53  | 12   | <i>LOC100702007</i> | Intron:7:7      |
| ChrLG23 |      | 16.812 | 19361070 | 7.33  | 11.5 |                     |                 |
| ChrLG23 |      | 17.908 | 20123698 | 7.32  | 11.5 | <i>LOC100705760</i> | Exon:5:9        |
| ChrLG23 |      | 16.664 | 19761461 | 6.98  | 11   | <i>LOC100707622</i> | Intron:2:10     |
| ChrLG23 |      | 15.502 | 19959935 | 6.41  | 10.4 | <i>nabl</i>         | Intron:3:8      |
| ChrLG23 |      | 14.962 | 16846754 | 5.89  | 9.4  | <i>jagn1</i>        | Upstream:3990   |
| ChrLG23 |      | 13.034 | 15608750 | 5.59  | 9    |                     |                 |
| ChrLG23 |      | 8.405  | 15608749 | 4.54  | 7.6  |                     |                 |
| ChrLG23 |      | 8.456  | 15608704 | 4.54  | 7.6  |                     |                 |
| ChrLG1  | FAM4 | 33.065 | 25773945 | 8.03  | 12.7 | <i>LOC100699231</i> | Exon:1:9        |
| ChrLG1  |      | 39.292 | 23290008 | 7.69  | 12.8 | <i>emc8</i>         | Downstream:2149 |



|        |        |          |      |      |                     |               |
|--------|--------|----------|------|------|---------------------|---------------|
| ChrLG1 | 42.752 | 22511506 | 7.63 | 12.2 | <i>rab27a</i>       | Upstream:1180 |
| ChrLG1 | 20.229 | 28756890 | 7.47 | 14.4 |                     |               |
| ChrLG1 | 20.229 | 28756856 | 7.47 | 14.4 |                     |               |
| ChrLG1 | 42.335 | 22632460 | 7.47 | 11.7 | <i>cog4</i>         | Exon:7:19     |
| ChrLG1 | 42.484 | 22632424 | 7.41 | 11.7 | <i>cog4</i>         | Intron:7:18   |
| ChrLG1 | 42.264 | 22632442 | 7.37 | 11.6 | <i>cog4</i>         | Intron:7:18   |
| ChrLG1 | 42.77  | 22511490 | 7.31 | 11.7 | <i>rab27a</i>       | Intron:1:5    |
| ChrLG1 | 42.651 | 22632627 | 7.27 | 11.6 | <i>cog4</i>         | Intron:6:18   |
| ChrLG1 | 42.651 | 22632441 | 7.25 | 11.6 | <i>cog4</i>         | Intron:7:18   |
| ChrLG1 | 34.123 | 26818125 | 7.04 | 11.2 | <i>greb1</i>        | Upstream:3727 |
| ChrLG1 | 83.032 | 7435430  | 6.62 | 14.6 | <i>csrp3</i>        | Intron:4:5    |
| ChrLG1 | 82.844 | 4817995  | 6.61 | 14.5 | <i>adamts17</i>     | Intron:2:19   |
| ChrLG1 | 83.713 | 8894478  | 6.6  | 14.9 | <i>celfl</i>        | Upstream:2492 |
| ChrLG1 | 83.318 | 785106   | 6.33 | 14.2 |                     |               |
| ChrLG1 | 15.307 | 30566255 | 6.25 | 11.2 |                     |               |
| ChrLG1 | 15.005 | 30566230 | 6.21 | 11.1 |                     |               |
| ChrLG1 | 8.001  | 32999490 | 5.94 | 10.2 | <i>LOC100695615</i> | Exon:1:9      |
| ChrLG1 | 8.001  | 32999334 | 5.94 | 10.2 | <i>LOC100695615</i> | Intron:1:8    |
| ChrLG1 | 9.094  | 32734592 | 5.92 | 10.1 | <i>csk</i>          | Intron:1:12   |
| ChrLG1 | 10.749 | 32999326 | 5.88 | 9.4  | <i>LOC100695615</i> | Intron:1:8    |
| ChrLG1 | 6.236  | 34046099 | 5.82 | 10.1 | <i>eprs</i>         | Upstream:1218 |
| ChrLG1 | 5.673  | 35481932 | 5.79 | 10.1 |                     |               |
| ChrLG1 | 5.673  | 35481952 | 5.74 | 10   |                     |               |
| ChrLG1 | 12.415 | 30920174 | 5.57 | 9.1  | <i>chd9</i>         | Intron:1:37   |
| ChrLG1 | 11.923 | 32999472 | 5.55 | 8.9  | <i>LOC100695615</i> | Exon:1:9      |
| ChrLG1 | 42.77  | 22511492 | 4.82 | 13.7 | <i>rab27a</i>       | Intron:1:5    |
| ChrLG1 | 42.77  | 22511461 | 4.82 | 13.7 | <i>rab27a</i>       | Intron:1:5    |

---

|        |        |          |      |      |                     |              |
|--------|--------|----------|------|------|---------------------|--------------|
| ChrLG1 | 43.92  | 22442553 | 4.77 | 12.8 | <i>nedd4</i>        | Intron:6:24  |
| ChrLG1 | 0.933  | 38584440 | 4.73 | 7.9  |                     |              |
| ChrLG1 | 43.37  | 22552880 | 4.7  | 12.9 | <i>LOC102081663</i> | Intron:12:16 |
| ChrLG1 | 1.878  | 37435805 | 4.69 | 7.8  | <i>LOC100709838</i> | Intron:22:23 |
| ChrLG1 | 1.162  | 38525302 | 4.67 | 7.8  |                     |              |
| ChrLG1 | 1.253  | 39553955 | 4.67 | 7.8  |                     |              |
| ChrLG1 | 2.235  | 38525449 | 4.65 | 7.7  |                     |              |
| ChrLG1 | 79.607 | 10859022 | 4.52 | 8.9  | <i>neol</i>         | Exon:10:28   |

---

**Supplementary Table S5. SNP distributions across genome of FAM3 from GWAS analysis**

| <b>Chromosome</b> | <b>Number of SNPs</b> | <b>Physical distance (bp)</b> |
|-------------------|-----------------------|-------------------------------|
| ChrLG1            | 275                   | 40673430                      |
| ChrLG2            | 290                   | 36523203                      |
| ChrLG3            | 339                   | 87567345                      |
| ChrLG4            | 273                   | 35549522                      |
| ChrLG5            | 245                   | 39714817                      |
| ChrLG6            | 238                   | 42433576                      |
| ChrLG7            | 552                   | 64772279                      |
| ChrLG8            | 251                   | 30527416                      |
| ChrLG9            | 258                   | 35850837                      |
| ChrLG10           | 229                   | 34704454                      |
| ChrLG11           | 306                   | 39275952                      |
| ChrLG12           | 230                   | 38600464                      |
| ChrLG13           | 259                   | 34734273                      |
| ChrLG14           | 244                   | 40509636                      |
| ChrLG15           | 360                   | 39688505                      |
| ChrLG16           | 271                   | 36041493                      |
| ChrLG17           | 239                   | 38839487                      |
| ChrLG18           | 281                   | 38636442                      |
| ChrLG19           | 213                   | 30963196                      |
| ChrLG20           | 166                   | 37140374                      |
| ChrLG22           | 232                   | 39199643                      |
| ChrLG23           | 406                   | 45655644                      |
| Total             | 6157                  |                               |

**Supplementary Table S6. SNP distribution among chromosomes in FAM4**

| <b>Chrom</b> | <b>Physical distance (bp)</b> | <b>SNP marker number</b> | <b>LOD value range</b> | <b>% Expl. range</b> |
|--------------|-------------------------------|--------------------------|------------------------|----------------------|
| ChrLG1       | 40673430                      | 62                       | 2.62-8.03              | 4.3-12.7             |
| ChrLG2       | 36523203                      | 57                       | 0.02-2.53              | 0-4.3                |
| ChrLG3       | 87567345                      | 65                       | 0-2.65                 | 0-4.3                |
| ChrLG4       | 35549522                      | 72                       | 0.08-1.3               | 0.1-2.1              |
| ChrLG5       | 39714817                      | 58                       | 0-1.54                 | 0-2.6                |
| ChrLG6       | 42433576                      | 34                       | 0-1.54                 | 0-3.4                |
| ChrLG7       | 64772279                      | 136                      | 0-3.11                 | 0-5.1                |
| ChrLG8       | 30527416                      | 77                       | 0-1.58                 | 0-2.6                |
| ChrLG9       | 35850837                      | 38                       | 0.07-1.88              | 0-4                  |
| ChrLG10      | 34704454                      | 67                       | 0-3.12                 | 0-5.1                |
| ChrLG11      | 39275952                      | 120                      | 0-1.01                 | 0-1.7                |
| ChrLG12      | 38600464                      | 37                       | 0.21-2.06              | 0.4-3.5              |
| ChrLG13      | 34734273                      | 27                       | 0-1.39                 | 0-2.3                |
| ChrLG14      | 40509636                      | 100                      | 0-1.62                 | 0-2.8                |
| ChrLG15      | 39688505                      | 72                       | 0.04-0.66              | 0.1-1.2              |
| ChrLG16      | 36041493                      | 35                       | 0.08-1.01              | 0.2-2                |
| ChrLG17      | 38839487                      | 51                       | 0.21-1.68              | 0.4-2.8              |
| ChrLG18      | 38636442                      | 59                       | 0.71-2.58              | 1.2-4.3              |
| ChrLG19      | 30963196                      | 57                       | 0.12-1.07              | 0.2-1.8              |
| ChrLG20      | 37140374                      | 61                       | 0.4-1.82               | 0.7-3                |
| ChrLG22      | 39199643                      | 60                       | 0.18-1.86              | 0-3.3                |
| ChrLG23      | 45655644                      | 77                       | 0.9-27.71              | 1.5-37.5             |
| Total        | –                             | 1422                     | 0-27.71                | 0-37.5               |
